# Supplementary material for: Alkalinity and carbon production in coastal aquifers via fresh and saline groundwater discharges into the coastal ocean
Source: Research Square preprint supplement (doi:10.21203/rs.3.rs-7499140/v1), 2025-09-09
Supplement: Supplementary file 1 [file 871766c578dbef82913a7de9.pdf]

1    **Supporting Information for**  
2    *Alkalinity and carbon production in coastal aquifers and their discharge*  
3    *into the coastal ocean*

4

5

6

7    This PDF file includes:

8

9    Supporting S1 to S5

10   Figures S1 to S3

11   Tables S1 to S2

12   SI References

### S.1. Methodology

We used 58 articles (Table S.1) to establish a dataset to characterize the total alkalinity (TA) and dissolved inorganic carbon (DIC) fluxes of fresh and saline coastal aquifers into the ocean. Since a few (8) articles contained data on both TA and DIC, we calculated DIC from the TA, pH, and major ions composition using the PHREEQC software (v. 3, 1). In all cases, concentrations are in  $\text{mol} \cdot \text{kg}_{\text{H}_2\text{O}}^{-1}$  unless otherwise noted. The DIC is defined as the sum of all dissolved inorganic carbon species concentration in the water:

$$[\text{DIC}] = [\text{H}_2\text{CO}_3^*] + [\text{HCO}_3^-] + [\text{CO}_3^{2-}] \quad (1)$$

When  $[\text{H}_2\text{CO}_3^*]$  is the total dissolved  $\text{CO}_2$ :  $[\text{H}_2\text{CO}_3^*] = [\text{CO}_2(aq)] + [\text{H}_2\text{CO}_3]$ .

The operational definition of total alkalinity (TA) is the equivalent sum of the titratable bases with strong acid, thus representing the aqueous system's neutralizing capacity. If the aquatic system is composed only of the weak bases of  $\text{CO}_2$  and water, the carbonate alkalinity (CA) equation is:

$$[\text{CA}] = [\text{HCO}_3^-] + 2[\text{CO}_3^{2-}] + [\text{OH}^-] - [\text{H}^+] \quad (2)$$

The TA equation must include other proton acceptors if the aquatic system contains weak bases (or acids) besides  $\text{CO}_2$ . Acid-base systems other than aqueous carbonate are often neglected in natural waters, but they might be included in distinct cases (2):

$$\begin{aligned} [\text{TA}] = & [\text{HCO}_3^-] + 2[\text{CO}_3^{2-}] + [\text{NH}_3] + [\text{HS}^-] + 2[\text{S}^{2-}] + [\text{H}_3\text{SiO}_4^-] + (3) \\ & [\text{H}_2\text{SiO}_4^{2-}] + [\text{B}(\text{OH})_4^-] + [\text{Org}^-] + [\text{HPO}_4^{2-}] + 2[\text{PO}_4^{3-}] - [\text{H}_3\text{PO}_4] + [\text{OH}^-] - \\ & [\text{H}^+] \end{aligned}$$

In natural waters and groundwaters, the non-carbon species in the TA composition are usually negligible, so we can assume that most of it is carbonate; thus, TA equals CA. The TA term is used throughout our paper since there are occasional high sulfide concentrations or other species, as well as what is measured in the lab corresponds to TA. The relation between TA and DIC is given by<sup>2</sup>:

$$[\text{TA}] = [\text{DIC}](\alpha_1 + 2\alpha_2) + [\text{OH}^-] - [\text{H}^+] \quad (4)$$

When:  $\alpha_1 = \left( \frac{[\text{H}^+]}{K_1} + 1 + \frac{K_2}{[\text{H}^+]} \right)^{-1}$  and  $\alpha_2 = \left( \frac{[\text{H}^+]^2}{K_1 K_2} + \frac{[\text{H}^+]}{K_2} + 1 \right)^{-1}$ .  $K_1$  and  $K_2$  are the equilibrium constants, which are known from the direct experimental determination of specific temperature and ionic strength (salinity).  $[\text{OH}^-]$  concentration can be calculated from  $K_W = [\text{OH}^-][\text{H}^+]$ ,  $K_W$  is the equilibrium constant for the self-ionization of water.  $[\text{H}^+]$  concentration is known from the relation  $[\text{H}^+] = 10^{-\text{pH}}$ . Therefore, for any pair of TA, pH, and DIC together with the ion composition (salinity) at 25°C PHREEQC can calculate the equilibrium constant and the species of the carbonate system and the unknown parameter (TA, pH, or DIC), in our case the DIC.

The DIC can be expressed as a function of  $P_{CO_2}$ , thus it is possible to calculate it by the solution's TA and pH (2):

$$[TA] = \frac{K_H P_{CO_2}}{\alpha_0} (\alpha_1 + 2\alpha_2) + K_w/[H^+] - [H^+] \quad (5)$$

where  $\alpha_0 = \left(1 + \frac{K_1}{[H^+]} + \frac{K_1 K_2}{H^2}\right)^{-1}$  and  $K_H$  are Henry's law constant, the distribution coefficient in equilibrium between the liquid and gaseous phases of  $CO_2$ . For the calculation of the partial pressure equivalent lines of  $CO_2$ , we used PHREEQC software, where, for each line, we assumed a range of possible DIC and calculated the TA for the average groundwater composition at a given salinity (fresh, brackish, saline) and constant  $P_{CO_2}$ .

Water measurements were divided into three categories based on chlorine concentration or salinity level: fresh, brackish, and saline. According to the description of the aquifer rock in each article (Table S1), we divided the data into four types of rock: carbonate, alluvium, sand, and basalt; however, there were very few measurements for basalts, so we also included one non-coastal aquifer to compare the effects of the rock on the carbon system parameters. A DIC calculation using pH and TA (papers 1-27 in Table S1) also requires ion composition; to have only reliable results, we calculated the charge balance for each water sample and included only samples with a value below 6%.

## S.2. DIC and TA enrichment/depletion calculation

To evaluate the enrichment/depletion of the TA or DIC in relation to conservative mixing between fresh groundwater and seawater, the difference between the measured component concentration ( $[DIC]_{\text{measured}}$ ) to the theoretical value based on only conservative mixing ( $[DIC]_{\text{mix}}$ ) was calculated:

$$[\Delta DIC] = [DIC]_{\text{measured}} - [DIC]_{\text{mix}} \quad (6)$$

The theoretical mixing DIC concentration was calculated as a conservative mixing between two endmembers:

$$[DIC]_{\text{mix}} = f_{\text{seawater}} \cdot [DIC]_{\text{seawater}} + (1 - f_{\text{seawater}}) \cdot [DIC]_{\text{freshwater}} \quad (7)$$

The value was only calculated for water samples included in the database of the paper's seawater composition ( $[DIC]_{\text{seawater}}$ ), while for fresh endmembers, the freshest water sample was taken from that paper ( $[DIC]_{\text{freshwater}}$ ).  $f_{\text{seawater}}$  is the fraction of seawater, which is calculated from the measured chloride concentration in the groundwater sample in assuming this ion has a conservative behavior in this system:

$$f_{\text{seawater}} = \frac{[\text{Cl}^-]_{\text{measured}} - [\text{Cl}^-]_{\text{freshwater}}}{[\text{Cl}^-]_{\text{seawater}} - [\text{Cl}^-]_{\text{freshwater}}} \quad (8)$$

In Figure 2, the calculations  $[\Delta\text{DIC}]$  and in the same way also  $[\Delta\text{TA}]$  are shown. All the samples lying above the zero line are enriched with DIC and TA compared to conservative mixing of the two endmembers (fresh groundwater and seawater), and all the samples below this line are depleted. It is clear that most of the samples are on or above this line, and therefore, the aquifer can serve as a source for TA and DIC.

### S.3. Determining the proportional contribution of each rock type to the total flow

The amount of freshwater discharge from each type of rock in the aquifer was calculated based on the work of Luijendijk et al., (2020), who calculated the SGD water discharge for coastal aquifers worldwide. In their work, they compared the geospatial database of drainage basins with the high-resolution geospatial database of surface lithology (GIS layer) described by Hartmann and Moosdorf (2012). In Table S2, we have narrowed down the 16 lithologies. Hartmann and Moosdorf (2012) divided the world map into five categories. The fresh SGD global calculation of Luijendijk et al. (2020) is based on parameter sensitivity analysis conducted numerically and upscaling the sensitivity analysis results to a global scale by calculating bilinear interpolations with global parameter databases. In their sensitivity analysis, they also calculated the saline SGD; however, contrary to the fresh SGD, they did not upscale the saline SGD to the global scale. We bridged this gap and calculated the saline SGD fluxes in all the coastal aquifers from their results in the same way. These simulations were done in a homogenous aquifer; however, Michael et al., (2016) reported that sediment heterogeneity increases the density-driven saline SGD flux by 20-100 times compared with that of homogenous models. Since Luijendijk et al. (2020) made the sensitivity analysis by a homogeneous model, we corrected the fluxes by a conservative factor of 20-100. The corrected total density-driven discharge is 400-2000 km<sup>3</sup> y<sup>-1</sup>. The density-driven saline SGD fluxes in all aquifers are detailed in Table 1. Using the same GIS database lithological division, we could divide the relative flow from each rock type for fresh and saline water using Hartmann & Moosdorf's (2012) detailed division (Fig. S1 A, B) and the reduction classification we used for this study (Fig. S1 C, D).

### S.4. Using the database's rock type descriptions to calculate DIC and alkalinity SGD fluxes

We calculate the TA and DIC fluxes (Tmol · y<sup>-1</sup>) by the equation:

$$F_{\text{fSGD},i} = [C]_i \times Q_i \quad (9)$$

When the freshwater flux ( $F_{\text{fSGD},i}$ ) was calculated for TA or DIC for each component  $i$ , the rock type in Table S2.  $[C]$  is the represented concentration of TA or DIC and  $Q$ (km<sup>3</sup> ·

$y^{-1}$ ) is the SGD water discharged for component  $i$ . Since in the saline flux, the groundwater contributes only the TA and DIC enrichment in relation to the seawater recharge to the aquifer, we used this equation:

$$F_{SSGD,i} = [\Delta C]_i \times Q_i \quad (10)$$

Also here the saline water flux ( $F_{SSGD,i}$ ) was calculated for TA or DIC for each component  $i$ .  $[\Delta C]_i$  is the enrichment factor of the circulated seawater concentration of TA or DIC as was calculated in Eq. 6.

### **S.5. Using the database's rock type descriptions to calculate DIC and alkalinity SGD fluxes**

To investigate the characteristics of DIC and TA, we conducted data processing and statistical analyses on groundwater data. To understand the distribution of the combined datasets, we calculated the 20th, 50th, and 80th percentiles for both DIC and TA. We refined our datasets by retaining only data points between the 20th and 80th percentiles. This filtered dataset was used for subsequent analyses to reduce the influence of outliers. For each case, we computed the mean and standard deviation, which were used for flux evaluations in Table 1. These descriptive statistics helped us understand data variability and estimate errors. Fig. S2 shows the distributions of DIC and TA in freshwater samples for four rock-type aquifers (Sand, Alluvium, Carbonate, and Basalt) (upper plot) and saline water samples for short and long circulation from the shoreline (lower plot). The box plot's lower quartile is set to 0.20, and the upper quartile to 0.80. The mean (shown as a star) is generally higher than the median because the dataset contains many high outliers. Since we consider these outliers, we filtered them out before further analysis. Fig. S3 displays histograms of the filtered DIC and TA datasets in freshwater (upper plots) and saline water (lower plots) samples from the different aquifers. The median values and standard deviations are annotated on each subplot. The histograms show the concentration distributions of DIC and TA across the aquifer types. Comparing these histograms reveals differences in DIC and TA distributions among the aquifers, providing insights into their geochemical characteristics. Overall, these histograms deliver a comprehensive visual overview of the DIC and TA distributions across various aquifer types, aiding in comparative analysis and interpretation of the geochemical data.

According to these analyses, we calculated the flux by multiplying the corrected median by the discharge for each water source and rock type (from Fig. S1). The calculated fluxes and their sums and errors (based on the standard deviation) are summarized in Table 1.

**Table S1. Data source for the DIC – Alkalinity database from coastal aquifers around the world**

|   | Reference                 | Paper Name                                                                                                    | Location                                                       | # of samples | Aquifer rock type | Salinity group                                                    | Rock type description                                                                                                                                                                                                                                                                                           | Sampling source                                                                     | Distance from the shore                                                    |
|---|---------------------------|---------------------------------------------------------------------------------------------------------------|----------------------------------------------------------------|--------------|-------------------|-------------------------------------------------------------------|-----------------------------------------------------------------------------------------------------------------------------------------------------------------------------------------------------------------------------------------------------------------------------------------------------------------|-------------------------------------------------------------------------------------|----------------------------------------------------------------------------|
| 1 | Magaritz and Luzier, 1985 | Water-rock interactions and seawater-freshwater mixing effects in the coastal dunes aquifer, Coos Bay, Oregon | Coos Bay, Oregon, West Coast, USA                              | 18           | Sand              | Fresh to saline                                                   | Shell-rich, gray marine sand (Pleistocene-Holocene), permeable dune sand.                                                                                                                                                                                                                                       | Boreholes                                                                           | 0–500 m (shoreline to inland wells)                                        |
| 2 | Chapelle et al., 1987     | Bacteria in deep coastal plain sediments of Maryland: A possible source of CO <sub>2</sub> to groundwater     | Maryland, USA                                                  | 8            | Sand              | Fresh water                                                       | Sand formation                                                                                                                                                                                                                                                                                                  | Boreholes                                                                           | Inland from the immediate coastal mixing zones with seawater               |
| 3 | Price and Herman, 1991    | Geochemical investigation of salt-water intrusion into a coastal carbonate aquifer: Mallorca, Spain           | Mallorca, Mediterranean Sea, Spain                             | 19           | Carbonate         | from 10% to 90% sea water<br><i>Included in saline SGD fluxes</i> | Limestone: The Camp de Tir site: eolian and beach calcarenite bedrock, highly porous. The Serra Nova site: bedrock covered by a thin layer of calcareous sand.                                                                                                                                                  | Boreholes                                                                           | 25m, 110m and 300m from the shore                                          |
| 4 | Wicks et al., 1995        | Water-rock interactions in a modern coastal mixing zone                                                       | West-central Florida, USA                                      | 62           | Carbonate         | Fresh and brackish<br><i>Included in saline SGD fluxes</i>        | Eocene–Oligocene limestone and dolomite. The upper Floridan aquifer system consists of the Suwannee Limestone (Oligocene), the Ocala Limestone (late Eocene), and the Avon Park Formation (middle Eocene).                                                                                                      | Boreholes                                                                           | 3.5 km from the shore                                                      |
| 5 | Wicks and Herman, 1996    | Regional hydrogeochemistry of a modern coastal mixing zone                                                    | West-central Florida, USA                                      | 12           | Carbonate         | Fresh and brackish                                                | Limestone and dolomite                                                                                                                                                                                                                                                                                          | Boreholes                                                                           | 0-9.5 km from the shore                                                    |
| 6 | Barker et al., 1998       | Processes affecting groundwater chemistry in a zone of saline intrusion into an urban sandstone aquifer       | Liverpool and the Mersey Estuary, England                      | 14           | Sand              | Fresh to saline                                                   | Sandstone. The sandstones are sublitharenites and quartz arenites and their mineralogy is typically quartz (50-70%), with feldspar (5-15%), lithic clasts (3-8%) and carbonate clasts and cement (0-20%). Some beds are very micaceous and authigenic clays such as illite, smectite, and kaolinite are common. | Estuary, river, seawater, tunnel outflows, groundwater inflow, pumping station sump | 550 m to 1175 m relative to estuary shoreline                              |
| 7 | Mahlknecht et al., 2004   | Groundwater chemistry and mass transfers in the Independence aquifer,                                         | Meseta Central, Central Mexico<br><i>Not a coastal aquifer</i> | 7            | Basalt            | Freshwater                                                        | Basalt and alluvium<br>Mainly of mafic rocks (basaltic lava flow, rhyolitic rocks).<br>Lacustrine deposits of sands,                                                                                                                                                                                            | Boreholes                                                                           | Inland, intermountain, sedimentary<br>Independence Basin in central Mexico |

|    | Reference                 | Paper Name                                                                                                                                                                         | Location                                                           | # of samples | Aquifer rock type | Salinity group                                                                 | Rock type description                                                                                                                                                                                                                                                                                                                                                                                                                                  | Sampling source       | Distance from the shore                                                                                                          |
|----|---------------------------|------------------------------------------------------------------------------------------------------------------------------------------------------------------------------------|--------------------------------------------------------------------|--------------|-------------------|--------------------------------------------------------------------------------|--------------------------------------------------------------------------------------------------------------------------------------------------------------------------------------------------------------------------------------------------------------------------------------------------------------------------------------------------------------------------------------------------------------------------------------------------------|-----------------------|----------------------------------------------------------------------------------------------------------------------------------|
|    |                           | central Mexico, by using multivariate statistics and mass-balance models                                                                                                           |                                                                    |              |                   |                                                                                | interstratified by gravels and clay, and on occasion by sandstone and conglomerate.                                                                                                                                                                                                                                                                                                                                                                    |                       |                                                                                                                                  |
| 8  | Andersen et al., 2005     | Geochemical processes and solute transport at the seawater/freshwater interface of a sandy aquifer                                                                                 | Skansehage peninsula, Iseffjord, northern part of Zealand, Denmark | 4            | Sand              | Fresh to saline                                                                | Coastal siliclastic aquifer containing minor amounts of calcite.                                                                                                                                                                                                                                                                                                                                                                                       | Piezometers           | A 120 m transect extending from the coastline and landward                                                                       |
| 9  | Charideh and Rahman, 2007 | Environmental isotopic and hydrochemical study of water in the karst aquifer and submarine springs of the Syrian coast                                                             | Syria                                                              | 16           | Carbonate         | mixing zone between fresh groundwater and seawater.                            | Karstified limestone and dolomite aquifer systems.                                                                                                                                                                                                                                                                                                                                                                                                     | Springs and boreholes | wells are located along the coastal line. Submarine springs discharge at various depths below sea level.                         |
| 10 | Bouchaou et al., 2008     | Application of multiple isotopic and geochemical tracers for investigation of recharge, salinization, and residence time of water in the Souss–Massa aquifer, southwest of Morocco | Souss–Massa aquifer, southwest of Morocco                          | 85           | Alluvium          | Coastal: modern seawater intrusion; Inland: fresh to fossil seawater influence | Plio-Quaternary sediments (sands, gravels, and lacustrine limestone), some layers contain evaporated minerals (gypsum in Jurassic and Cretaceous, and halite in Triassic formations).                                                                                                                                                                                                                                                                  | Springs and boreholes | 0 m (coast) to far inland (up to High Atlas region). Groundwater from coastal plains, inland plains, and mountain recharge zones |
| 11 | de Montety et al., 2008   | Origin of groundwater salinity and hydrogeochemical processes in a confined coastal aquifer: Case of the Rhône delta (Southern France)                                             | Rhône Delta, Southern France                                       | 8            | Alluvium          | Freshwater mixtures with seawater                                              | Quaternary deposits of the delta. Two levels of deposits are distinguished within the gravels. The first deposit (Lower Pleistocene) is mainly made of highly altered gravels of quartzite and limestone with a yellow matrix of sand and sometimes marl or clay (mainly montmorillonite). In the second deposit (Upper Pleistocene), the gravels are not altered and are more diversified (including green rocks, variolites, and crystalline rocks). | Piezometers           | between 8 km and 20 km from the coast                                                                                            |
| 12 | Gattacceca et al., 2009   | Isotopic and geochemical characterization of salinization in the shallow aquifers of a reclaimed subsiding zone: The southern                                                      | Southern Venice Lagoon coastland, Italy                            | 12           | Alluvium          | Fresh to saline                                                                | A complex heterogeneous mixture of highly calcareous layers (sandy and silty–clayey) with local clay lenses and peat layers (Brambati)                                                                                                                                                                                                                                                                                                                 | Boreholes             | 0–7 km (saline zone), 7–20 km inland (brackish zone)                                                                             |

|    | Reference                     | Paper Name                                                                                                                                           | Location                                                                                                            | # of samples | Aquifer rock type       | Salinity group                  | Rock type description                                                                                                                                                                                                                                                                     | Sampling source                       | Distance from the shore                                                                                                                       |
|----|-------------------------------|------------------------------------------------------------------------------------------------------------------------------------------------------|---------------------------------------------------------------------------------------------------------------------|--------------|-------------------------|---------------------------------|-------------------------------------------------------------------------------------------------------------------------------------------------------------------------------------------------------------------------------------------------------------------------------------------|---------------------------------------|-----------------------------------------------------------------------------------------------------------------------------------------------|
|    |                               | Venice Lagoon coastland                                                                                                                              |                                                                                                                     |              |                         |                                 |                                                                                                                                                                                                                                                                                           |                                       |                                                                                                                                               |
| 13 | Chae et al., 2012             | Seawater–freshwater mixing and resulting calcite dissolution: an example from a coastal alluvial aquifer in eastern South Korea                      | Okgye area, Eastern Coast, South Korea                                                                              | 3            | Alluvium                | Fresh water - seawater mixtures | Alluvial groundwater in a limestone-rich coastal area                                                                                                                                                                                                                                     | Boreholes                             | One site is located within 1 km of the coastline, and the other is located approximately 2.5 km away.                                         |
| 14 | Vandenbohe de and Lebbe, 2012 | Groundwater chemistry patterns in the phreatic aquifer of the central Belgian coastal plain                                                          | The central Belgian coastal plain, North Sea coast, Belgium                                                         | 18           | Sand                    | Fresh water - seawater mixtures | Fluvial and marine deposits (mainly coarse sand)                                                                                                                                                                                                                                          | Boreholes                             | Between few meters up to 2.5 km from the shore.                                                                                               |
| 15 | Ahmed et al., 2013            | Factors controlling mechanisms of groundwater salinization and hydrogeochemical processes in the Quaternary aquifer of the Eastern Nile Delta, Egypt | Eastern Nile Delta, Egypt                                                                                           | 61           | Alluvium                | Fresh to brackish               | Deltaic deposits: Nile silt, old deltaic sands, and gravels which are underlain by fluvio-marine deposits                                                                                                                                                                                 | 8 canals, 12 drains, and 41 boreholes | No specific distance information. A range of distances from the shore, from near 0 m at the northern coast to potentially over 100 km inland. |
| 16 | Vinson et al., 2013           | Occurrence and mobilization of radium in fresh to saline coastal groundwater inferred from geochemical and isotopic tracers (Sr, S, O, H, Ra, Rn)    | Agadir, southwestern Morocco                                                                                        | 17           | Alluvium                | Fresh to brackish               | The primary aquifer consists of overlying Pliocene to Pleistocene transgressive deposits, up to 100 m of marine clay, sand, gravel, and limestone, overlain by conglomerate, sandy limestone, and shelly sandstone, with sandstone and conglomerate being important water-yielding units. | Boreholes                             | From few meters up to 5 km from the seashore.                                                                                                 |
| 16 | Vinson et al., 2013           | Occurrence and mobilization of radium in fresh to saline coastal groundwater inferred from geochemical and isotopic tracers (Sr, S, O, H, Ra, Rn)    | Confined Cretaceous (Cape Fear) and Pliocene (Yorktown) aquifers of the Atlantic Coastal Plain, North Carolina, USA | 22           | Alluvium                | Fresh to brackish               | Cape Fear formation is interpreted as deltaic deposits including offshore components. The Yorktown aquifer is composed of marine sand and clay containing abundant shell material and is locally phosphatic                                                                               | Boreholes                             | In the Yorktown aquifer very close to the shore, and in the Cape Fear aquifers between 10 and 50 kilometers, approximately.                   |
| 17 | Zhang et al., 2015            | Geochemical and isotopic data for restricting seawater intrusion and groundwater circulation in a series                                             | Leizhou peninsular, South China Sea                                                                                 | 16           | Sand and volcanic rocks | Fresh to brackish               | Sandy soil and pore fractured volcanic compose the main aquifers, whereas impermeable clay layers act as aquicludes                                                                                                                                                                       | Boreholes and ponds                   | From near shore up to 10 km.                                                                                                                  |



|    | Reference              | Paper Name                                                                                                                                                                                                                       | Location                                                            | # of samples | Aquifer rock type      | Salinity group    | Rock type description                                                                                                                                                                                                                                                                                                                                                                                                                                                               | Sampling source    | Distance from the shore                              |
|----|------------------------|----------------------------------------------------------------------------------------------------------------------------------------------------------------------------------------------------------------------------------|---------------------------------------------------------------------|--------------|------------------------|-------------------|-------------------------------------------------------------------------------------------------------------------------------------------------------------------------------------------------------------------------------------------------------------------------------------------------------------------------------------------------------------------------------------------------------------------------------------------------------------------------------------|--------------------|------------------------------------------------------|
|    |                        | of typical volcanic islands in the South China Sea                                                                                                                                                                               |                                                                     |              |                        |                   |                                                                                                                                                                                                                                                                                                                                                                                                                                                                                     |                    |                                                      |
| 18 | Díaz-Puga et al., 2016 | Groundwater flow and residence time in a karst aquifer using ion and isotope characterization                                                                                                                                    | Sierra de Gador, SE Spain                                           | 64           | Carbonate              | Fresh             | Karst carbonate massif: carbonate rocks (dolostone and limestone) with interlayers of more soluble mineral phases (e.g. anhydrite, gypsum, and minor halite and fluorite)                                                                                                                                                                                                                                                                                                           | Springs and wells  | From near shore up to 20 km.                         |
| 19 | Han et al., 2016       | Identification of anthropogenic and natural inputs of sulfate into a karstic coastal groundwater system in northeast China: evidence from major ions, $\delta^{13}\text{C}_{\text{DIC}}$ and $\delta^{34}\text{S}_{\text{SO}_4}$ | Daweijia area of Dalian, Bohai Sea coast, northeast China           | 10           | Limestone and Alluvium | Brackish          | The upper aquifer is composed of Quaternary sediments consisting of gravel, sand, and clay layers. The carbonate aquifers underlying the Quaternary deposits are mainly composed of limestone, with major karst development.                                                                                                                                                                                                                                                        | Boreholes          | 1-8 km from the shore.                               |
| 20 | Sajil Kumar, 2016      | Deciphering the groundwater–saline water interaction in a complex coastal aquifer in South India using statistical and hydrochemical mixing models                                                                               | Cuddalore district, Tamil Nadu, Southern India                      | 11           | Alluvium               | Fresh             | Fluvial fluvio-marine and marine facies: soil, fine to coarse-grained sands, silts, clays laterite, and lateritic gravels the semi-consolidated formations comprising silts, clay stones, calcareous sandstones, siliceous limestones, and algal limestones.                                                                                                                                                                                                                        | Boreholes          | From near shore up to 40 km.                         |
| 21 | Santoni et al., 2016   | Residence time, mineralization processes, and groundwater origin within a carbonate coastal aquifer with a thick unsaturated zone                                                                                                | Bonifacio plateau, southeast Corsica, western Mediterranean, France | 15           | Carbonate              | Fresh             | The base of fluvial detrital series (weathered granites with a carbonated fraction, ignimbritic tufa) A second set composed of carbonate marine sediments (shelly litharenites, sandy silt, and coralline-rich calcarenites). At the base, are calcareous sandstones and sandy calcarenites. Above, coralline sandstones with limestone cement and coralline sandy calcarenites. Many lenses filled with gravel material are present. Well-cemented limestone completes the series. | Boreholes          | From several meters up to about 3 km from the shore. |
| 22 | Carreira et al., 2018  | Tracing salinization processes in coastal aquifers using an isotopic and                                                                                                                                                         | Essaouira, Atlantic Ocean coast, western Morocco                    | 10           | Sand                   | Fresh to brackish | Detrital deposits (sandstones, conglomerates, and sands) and calco-dolomitic layers                                                                                                                                                                                                                                                                                                                                                                                                 | Springs, boreholes | From few km up to 50 km.                             |

|    | Reference             | Paper Name                                                                                                                                                   | Location                                                                       | # of samples | Aquifer rock type | Salinity group                   | Rock type description                                                                                                                                                                                                                             | Sampling source    | Distance from the shore                                               |
|----|-----------------------|--------------------------------------------------------------------------------------------------------------------------------------------------------------|--------------------------------------------------------------------------------|--------------|-------------------|----------------------------------|---------------------------------------------------------------------------------------------------------------------------------------------------------------------------------------------------------------------------------------------------|--------------------|-----------------------------------------------------------------------|
|    |                       | geochemical approach: comparative studies in western Morocco and southwest Portugal                                                                          |                                                                                |              |                   |                                  |                                                                                                                                                                                                                                                   |                    |                                                                       |
| 22 | Carreira et al., 2018 | Tracing salinization processes in coastal aquifers using an isotopic and geochemical approach: comparative studies in western Morocco and southwest Portugal | Lower Tagus–Sado sedimentary, southwest Portugal                               | 35           | Alluvium          | Fresh to brackish                | Alluvial formations, sand and clay layers, sandstones and limestones                                                                                                                                                                              | Springs, boreholes | From close to the shore up to few tens of km.                         |
| 23 | Han and Currell, 2018 | Delineating multiple salinization processes in a coastal plain aquifer, northern China: hydrochemical and isotopic evidence                                  | Yang–Dai coastal river plain, Qinhuangdao City, Hebei province, Northern China | 34           | Sand              | Fresh to saline                  | Medium sand, coarse sand, and gravel layers                                                                                                                                                                                                       | Production wells   | From near shore up to 12 km.                                          |
| 24 | Vallejos et al., 2018 | Influence of the paleogeographic evolution on the groundwater salinity in a coastal aquifer. Cabo de Gata aquifer, SE Spain                                  | Cabo de Gata, south-east of the Iberian Peninsula, Spain                       | 22           | Sand              | Brackish, saline and hypersaline | Plio-Pleistocene conglomerate and sandstone with a mean thickness of 80 m. The top of the formation comprises cemented conglomerate and beneath these is a thick layer of sandstone. Underlying this are intercalations of conglomerate and sand. | Boreholes          | The nine boreholes, situated between 350 and 650 m from the coast.    |
| 25 | Mohanty and Rao, 2019 | Hydrogeochemical, seawater intrusion, and oxygen isotope studies on a coastal region in the Puri District of Odisha, India                                   | Puri District of Odisha, India                                                 | 25           | Alluvium          | Fresh to brackish                | Fluvial-deltaic sediments - sand, silt, clay, gravel, pebbles. The unconfined aquifer consists of alluvium, clay, and granular material and the deeper aquifer consists of sands, and pebbles with intercalated clay bands.                       | Boreholes          | From 4 to 12 km from the Bay of Bangal coast                          |
| 26 | Monnin et al., 2019   | Freshening of a Coastal Karst Aquifer Revealed by the Temporal Changes in a Spring Water Composition (La Palme, Southern France)                             | La Palme, Mediterranean coast, Southern France                                 | 11           | Carbonate         | Brackish                         | Karstic aquifer, Jurassic-Lower Cretaceous limestone formations with a thickness of ~200                                                                                                                                                          | Springs            | Approximately 3 km inland from the present-day shoreline              |
| 27 | Naus et al., 2019     | Groundwater salinity variation in Upazila Assasuni (southwestern Bangladesh), as                                                                             | Upazila Assasuni, southwestern Bangladesh                                      | 108          | Sand              | Fresh to brackish                | Sands with carbonates with small discontinuous organic-matter-rich clay layers                                                                                                                                                                    | Boreholes          | Within ~6.3 km coastal delta (exact shoreline distance not specified) |

|    | Reference              | Paper Name                                                                                                                                    | Location                                                  | # of samples | Aquifer rock type   | Salinity group     | Rock type description                                                                                                                                                                                                                  | Sampling source            | Distance from the shore                                                                                                                                                             |
|----|------------------------|-----------------------------------------------------------------------------------------------------------------------------------------------|-----------------------------------------------------------|--------------|---------------------|--------------------|----------------------------------------------------------------------------------------------------------------------------------------------------------------------------------------------------------------------------------------|----------------------------|-------------------------------------------------------------------------------------------------------------------------------------------------------------------------------------|
|    |                        | steered by surface clay layer thickness, relative elevation, and present-day land use                                                         |                                                           |              |                     |                    |                                                                                                                                                                                                                                        |                            |                                                                                                                                                                                     |
| 28 | Yechieli et al., 2019  | Recent seawater intrusion into deep aquifer determined by the radioactive noble-gas isotopes $^{81}\text{Kr}$ and $^{39}\text{Ar}$            | Yarkon–Taninim Basin, Eastern Mediterranean coast, Israel | 6            | Carbonate           | Brackish to saline | Karstic limestones and dolomites with some marls and chalks                                                                                                                                                                            | Boreholes                  | Between few km up to ~20 km                                                                                                                                                         |
| 29 | Houéménou et al., 2020 | Degradation of groundwater quality in expanding cities in West Africa. A T case study of the unregulated shallow aquifer in Cotonou           | Cotonou, Atlantic Ocean Benin, West Africa                | 43           | Alluvium            | Fresh              | fine to medium sands (85.5%), silts (5.5%) and clays (9%)                                                                                                                                                                              | Boreholes, piezometers     | Between about 2.5 to 5 km from the ocean coast, some of the sampling points are adjacent to the lake shore.                                                                         |
| 30 | Okuhata et al., 2020   | Metal Mobilization As An Effect of Anthropogenic Contamination in Groundwater Aquifers in Tutuila, American Samoa                             | Tutuila, American Samoa, South Pacific                    | 18           | Basalt              | Fresh              | Pleistocene age complex of volcanic shields deeply eroded into a rugged, mountainous edifice, while Holocene age rejuvenated volcanic eruptions later built the relatively flat Tafuna–Leone Plain on the shields’ southwestern flank. | Boreholes, springs         | The island features coastal springs along its shores, upland springs located up to 2 km from the shore, and boreholes situated up to 6 km away from the coasts.                     |
| 31 | Pain et al., 2020      | Carbon and phosphorus processing in a carbonate karst aquifer and delivery to the coastal ocean                                               | Puerto Morelos, Yucatan, Mexico                           | 20           | carbonate           | Fresh to saline    | karstic carbonate platform of Triassic to Holocene age.                                                                                                                                                                                | Cenotes, springs, borehole | Inland cenotes were sampled approximately 21 km inland from the coast. The near-shore well was located approximately 100 m inland. The SGD springs are distributed along the shore. |
| 32 | Vallejos et al., 2020  | Anthropic-induced salinization in a dolomite coastal aquifer. Hydrogeochemical processes                                                      | Balanegra, Mediterranean Sea, SE Spain                    | 45           | Carbonate           | Fresh to brackish  | Dolomite and dolomitic limestone                                                                                                                                                                                                       | Boreholes                  | Coastline up to 10 km from the shore                                                                                                                                                |
| 33 | Godfrey et al., 2021   | $\delta^{13}\text{C}$ and $^{14}\text{C}$ activity of groundwater DOC and DIC in the volcanically active and arid Loa Basin of northern Chile | Río Loa Basin Northern Chile                              | 9            | Basalt and alluvial | Fresh to brackish  | Fractured basaltic andesite lava, dacitic and rhyodacitic ignimbrite, or unconsolidated ash and volcanic debris flows. Stacked aquifers occur within                                                                                   | Boreholes, springs         | 100–200 km inland from Pacific Ocean                                                                                                                                                |

|    | Reference               | Paper Name                                                                                                                                                                             | Location                                                    | # of samples | Aquifer rock type | Salinity group                                               | Rock type description                                                                                                                   | Sampling source             | Distance from the shore                                                                                             |
|----|-------------------------|----------------------------------------------------------------------------------------------------------------------------------------------------------------------------------------|-------------------------------------------------------------|--------------|-------------------|--------------------------------------------------------------|-----------------------------------------------------------------------------------------------------------------------------------------|-----------------------------|---------------------------------------------------------------------------------------------------------------------|
|    |                         |                                                                                                                                                                                        |                                                             |              |                   |                                                              | palustrine-lacustrine limestone and conglomerate gravels.                                                                               |                             |                                                                                                                     |
| 34 | Zhang and Zhang, 2021   | The hydrological connection between fresh submarine groundwater discharge and coastal groundwater: an isotopic and a decadal hydrochemistry approach in an alluvial fan, central Japan | Katakai alluvial fan, Sea of Japan, Japan                   | 13           | Alluvium          | Freshwater                                                   | The alluvial fan consists of three layers: A. alluvium of gravel, sand, and clay. B. gravel, sand, and clay. C. sandstone and mudstone. | Boreholes, SGD flux chamber | The boeholes' locations are from near shore up to 5 km, SGD sites are located 150–200 m seaward from the coastline. |
| 35 | Sola and Vallejos, 2022 | Long and short-term cation exchange linked to a negative hydraulic barrier in a coastal aquifer                                                                                        | The Andarax Delta Aquifer, SE Spain                         | 47           | Alluvium          | Freshwater –seawater mixing                                  | Conglomerate, sand, and thin silt levels.                                                                                               | Boreholes                   | Close to the shoreline up to 1 km.                                                                                  |
| 36 | Cai et al., 2003        | The geochemistry of dissolved inorganic carbon in a surficial groundwater aquifer in North Inlet, South Carolina, and the Carbon fluxes to the coastal ocean                           | North Inlet, Georgetown County, South Carolina, USA         | 13           | Sand              | Fresh to brackish                                            | Unconsolidated and semiconsolidated layers of sand and clay, and poorly indurated to very dense layers of limestone and dolomite.       | Piezometer                  | The piezometer transects are from the shore line across the marsh swale up to 500 m.                                |
| 37 | Gramling et al., 2003   | A carbon isotope method to quantify groundwater discharge at the land-sea interface                                                                                                    | Cape Fear region of southeastern North Carolina, USA        | 19           | Carbonate         | Fresh to brackish                                            | consisting primarily of shell limestone, dolomitic limestone, sandy limestone, and fine to medium sand                                  | Boreholes                   | varying distances from the immediate shoreline up to 4 km.                                                          |
| 38 | Sivan et al., 2005      | Geochemical evolution and timescale of seawater intrusion into the coastal aquifer of Israel                                                                                           | Poleg area , Netanya, Mediterranean coastal aquifer, Israel | 19           | Sand              | Freshwater to saline<br><i>Included in saline SGD fluxes</i> | Interlayered sand, calcareous sandstone (Kurkar), red loam (Hamra) and marine clays of the Pleistocene age                              | Boreholes                   | 70 m from the shoreline                                                                                             |
| 39 | Russak and Sivan, 2010  | Hydrogeochemical tool to identify salinization or freshening of coastal aquifers determined from combined fieldwork, experiments, and modeling                                         | Mediterranean coastal aquifer and the Poleg area, Israel    | 5            | Sand              | Brackish to saline                                           | Calcareous sandstone (Kurkar), red loam (Hamra) and marine clays of the Pleistocene age                                                 | Boreholes                   | 70 m from the shoreline                                                                                             |
| 40 | Bakari et al., 2012     | Groundwater residence time and paleo recharge                                                                                                                                          | Southeastern Tanzania                                       | 19           | Alluvium          | Fresh                                                        | limestone and conglomerates interbedded by sandy clays and                                                                              | Boreholes                   | The shallow unconfined aquifer located less than 5 km from the Indian                                               |

|    | Reference                | Paper Name                                                                                                                              | Location                                                  | # of samples | Aquifer rock type | Salinity group     | Rock type description                                                                                                                     | Sampling source                                        | Distance from the shore                                                                                                                                                                                                                            |
|----|--------------------------|-----------------------------------------------------------------------------------------------------------------------------------------|-----------------------------------------------------------|--------------|-------------------|--------------------|-------------------------------------------------------------------------------------------------------------------------------------------|--------------------------------------------------------|----------------------------------------------------------------------------------------------------------------------------------------------------------------------------------------------------------------------------------------------------|
|    |                          | conditions in the deep confined aquifers of the coastal watershed, Southeast Tanzania                                                   |                                                           |              |                   |                    | clayey sands with minor lenses of pure sand or clay                                                                                       |                                                        | Ocean. The deep confined aquifer is recharged from inland areas, the sampling sites are located up to 20 km from the shore.                                                                                                                        |
| 41 | Liu et al., 2012         | How significant is submarine groundwater discharge and its associated dissolved inorganic carbon in a river-dominated shelf system?     | Huiyang District, northern South China Sea, China         | 13           | Sand              | Fresh to brackish  | The aquifer in the littoral plain is a sandy lens up to 20 m thick,                                                                       | Boreholes, springs                                     | Close to the shoreline.                                                                                                                                                                                                                            |
| 42 | Liu et al., 2014         | Effect of submarine groundwater discharge on the coastal ocean inorganic carbon cycle                                                   | Charlotte Harbor, FL, USA                                 | 44           | Limestone         | Fresh to brackish  | Subtropical carbonate platforms often overlying karstic limestone comprised of abundant fossil mollusk and calcareous and coralline algae | Boreholes, piezometers                                 |                                                                                                                                                                                                                                                    |
| 43 | Wang et al., 2014        | Coastal Acidification Induced by Tidal-Driven Submarine Groundwater Discharge in a Coastal Coral Reef System                            | Sanya Bay, Hainan Island, northern South China Sea, China | 13           | Alluvium          | Saline             | Holocene deposits of coral debris, sand, and silt surround the coast,                                                                     | Boreholes                                              | ~100 m away from the shore.                                                                                                                                                                                                                        |
| 44 | Lee and Kim, 2015        | Dependence of coastal water pH increases on submarine groundwater discharge off a volcanic island                                       | Hwasun Bay off the volcanic island of Jeju, Korea         | 11           | Basalt            | Brackish to saline | Basaltic rocks, along the coast sandy sediments that overlie the thick and highly permeable basaltic layer.                               | Boreholes, onboard a ship by use of a submersible pump | Seawater sampling stations were located inside the bay and outside the bay. The transect line for vertical distribution measurements extended from the shoreline to about 1.0 km offshore. Groundwater samples were collected along the shoreline. |
| 45 | Wang et al., 2015        | Net subterranean estuarine export fluxes of dissolved inorganic C, N, P, Si, and total alkalinity into the Jiulong River estuary, China | Xiamen Bay, China                                         | 24           | Alluvium          | Fresh to brackish  | sands, clayey silts, and silty clay                                                                                                       | Boreholes                                              | The wells were located within 2.2 km distance from the water channel.                                                                                                                                                                              |
| 46 | Sadat-Noori et al., 2016 | Groundwater Discharge as a Source of Dissolved Carbon and Greenhouse Gases                                                              | Hat Head, NSW, Australia                                  | 27           | Sand              | Fresh to saline    | Sandy beach environment                                                                                                                   | Push point piezometer, boreholes                       | Shallow groundwater wells were dug adjacent to the estuary. Deep monitoring wells were                                                                                                                                                             |

|    | Reference              | Paper Name                                                                                                                                                  | Location                                       | # of samples | Aquifer rock type | Salinity group                                                      | Rock type description                                                                                                                                                                                 | Sampling source                              | Distance from the shore                                                    |
|----|------------------------|-------------------------------------------------------------------------------------------------------------------------------------------------------------|------------------------------------------------|--------------|-------------------|---------------------------------------------------------------------|-------------------------------------------------------------------------------------------------------------------------------------------------------------------------------------------------------|----------------------------------------------|----------------------------------------------------------------------------|
|    |                        | in a Subtropical Estuary                                                                                                                                    |                                                |              |                   |                                                                     |                                                                                                                                                                                                       |                                              | located across the catchment up to 1200 m from the seashore.               |
| 47 | Bryan et al., 2017     | Carbon dynamics in a Late Quaternary-age coastal limestone aquifer system undergoing saltwater intrusion                                                    | Rottneest Island, south-west Western Australia | 29           | Carbonate         | Fresh to saline                                                     | Limestone varies from strongly lithified to friable which contains various proportions of quartz sand, fine- to medium-grained shell fragments, and minor clayey lenses.                              | Boreholes                                    | From few meter up to about 1 km from the shoreline.                        |
| 48 | Caschetto et al., 2017 | Nitrogen and sulfur cycling in the saline coastal aquifer of Ferrara, Italy. A multi-isotope approach                                                       | Ferrara, Italy                                 | 22           | Sand              | Fresh to saline                                                     | Sandy units and shallow marine wedge deposits                                                                                                                                                         | Boreholes                                    | Near shore up to 20 km from the shore.                                     |
| 49 | Liu et al., 2017       | Carbonate system biogeochemistry in a subterranean estuary – Waquoit Bay, USA                                                                               | Waquoit Bay, Cape Cod, Massachusetts, USA      | 175          | Sand              | Freshwater-saltwater mixing<br><i>Included in saline SGD fluxes</i> | Coarse and fine sand as well as gravel.                                                                                                                                                               | Piezometer                                   | Between 3.5 m inland and 3 m seaward.                                      |
| 50 | Prouty et al., 2017    | Vulnerability of Coral Reefs to Bioerosion From Land-Based Sources of Pollution                                                                             | Maui, HI, USA                                  | 150          | Carbonate         | Brackish to saline                                                  | nearshore coral reef ecosystems                                                                                                                                                                       | Piezometers                                  | Seep sites up to 52 m offshore in the coral reef.                          |
| 51 | Bandara et al., 2018   | Arsenic-rich shallow groundwater in sandy aquifer systems buffered by rising carbonate waters: A geochemical case study from Mannar Island, Sri Lanka       | Mannar Island, Sri Lanka                       | 35           | Sand              | Fresh                                                               | Sand dunes                                                                                                                                                                                            | Boreholes                                    | From near shore up to 2 km from the sealine (in the middle of the island). |
| 52 | Meredith et al., 2018  | Evolution of dissolved inorganic carbon in groundwater recharged by cyclones and groundwater age estimations using the <sup>14</sup> C statistical approach | Pardoo Ck, WA, Australia                       | 23           | Sand              | Fresh                                                               | Wallal Sandstone is the main aquifer in the multilayered aquifer system of the West Canning Basin. Semi-confined artesian aquifer. It comprises sandstone with rare siltstones and gravel interbeds.  | Boreholes                                    | From near shore up to 30 km.                                               |
| 53 | Murgulet et al., 2018  | Temporal and spatial fluctuations of groundwater-derived alkalinity fluxes to a semiarid coastal embayment                                                  | Nueces Bay, TX, USA                            | 35           | Sand              | Fresh to saline                                                     | High sand percentage: The north-bay region has sandier sediments with a lower clay content (~20%), compared to the West-bay and Mid-bay, ~35–50% clay. In the deeper layers consist of less permeable | Retract-a-tip sampler (porewater), boreholes | From near shore up to 30 km (for the deep wells).                          |

|    | Reference               | Paper Name                                                                                                                             | Location                                                          | # of samples | Aquifer rock type | Salinity group     | Rock type description                                                                                                                                                                                                                                                                    | Sampling source                           | Distance from the shore                                                                                                                                                                                                |
|----|-------------------------|----------------------------------------------------------------------------------------------------------------------------------------|-------------------------------------------------------------------|--------------|-------------------|--------------------|------------------------------------------------------------------------------------------------------------------------------------------------------------------------------------------------------------------------------------------------------------------------------------------|-------------------------------------------|------------------------------------------------------------------------------------------------------------------------------------------------------------------------------------------------------------------------|
|    |                         |                                                                                                                                        |                                                                   |              |                   |                    | materials such as mud, clay, and silts saturated with high salt content water.                                                                                                                                                                                                           |                                           |                                                                                                                                                                                                                        |
| 54 | Tan et al., 2018        | Shelf-Scale Submarine Groundwater Discharge in the Northern South China Sea and East China Sea and its Geochemical Impacts             | Pearl River, northern South and the East China Sea shelf, China   | 48           | Alluvium          | Fresh to saline    | The surface sediments on the NSCS continental shelf show grain size gradations from gravel inshore to soil offshore. The region along the shoreline of the NSCS is composed of thick and widespread quaternary deposits, with terrigenous and biogenous detritus as the major components | Boreholes and PushPoint sampler           | Along the shore and offshore.                                                                                                                                                                                          |
| 55 | Dai et al., 2021        | Submarine Groundwater Discharge on the Western Shelf of the Northern South China Sea Influenced by the Pearl River Plume and Upwelling | Pearl River, western shelf of the Northern South China Sea, China | 8            | Sand              | Saline             | Sandy beach                                                                                                                                                                                                                                                                              | Pushpoint sampler and a peristaltic Pump. | Water samples were collected along nine cross-shelf transects, spanning from nearshore to offshore, up to 51 km offshore.                                                                                              |
| 56 | Kolker et al., 2021     | An Initial Assessment of the Contribution of Fresh Submarine Ground Water Discharge to the Alkalinity Budget of the Mediterranean Sea  | Shikmona shore, Haifa, Israel                                     | 27           | Carbonate         | Brackish           | Mostly carbonate rocks of the Judea group such as limestone, chalk, and dolomite. The shore is fringed by Kurkar (sand and calcite cemented sandstone) abrasion platforms.                                                                                                               | Springs                                   | Shoreline                                                                                                                                                                                                              |
| 57 | Liu et al., 2021        | Inorganic carbon and alkalinity biogeochemistry and fluxes in an intertidal beach aquifer: Implications for ocean acidification        | Tolo Harbor, Hong Kong                                            | 208          | Sand              | Fresh to saline    | The sediments of the sandy beach can be classified as well sorted gravelly sand.                                                                                                                                                                                                         | Piezometer and boreholes                  | The sampling points ranged from approximately 50 m landward to 50 m seaward of the mean tidal mark, with zones like the mangrove area located between 50 and 30 m and the high salinity zone spanning from 30 to 50 m. |
| 58 | Reithmaier et al., 2021 | Rainfall drives rapid shifts in carbon and nutrient source-sink dynamics of an urbanized, mangrove-fringed estuary                     | Coffs Creek, east coast of New South Wales, Australia             | 12           | Alluvium          | Brackish to saline | Basalt-derived podzolic soils and unconsolidated sediments consisting of clay, silt, sand, and gravel deposits at the estuarine deltas                                                                                                                                                   | Boreholes                                 | 0–6.2 km along estuary (intertidal mangrove zone)                                                                                                                                                                      |

148 **Table S2. Rock type classifications**

| This study aquifer's<br>rock classification | Hartmann & Moosdorf (2012) lithology classification                                                                                                                              |
|---------------------------------------------|----------------------------------------------------------------------------------------------------------------------------------------------------------------------------------|
| Alluvium                                    | su Unconsolidated sediments + ev Evaporites                                                                                                                                      |
| Carbonate                                   | sc Carbonate sedimentary rocks                                                                                                                                                   |
| Sand                                        | Siliciclastic sedimentary rocks + sm Mixed sedimentary rocks                                                                                                                     |
| Basalt                                      | vb Basic volcanic rocks + pb Basic plutonic rocks + vi Intermediate volcanic<br>rock                                                                                             |
| Other                                       | va Acid volcanic rocks + m t Metamorphics + pa Acid plutonic rocks + wb<br>Water Bodies + py Pyroclastics + pi Intermediate plutonic rocks + nd No Data<br>+ ig Ice and Glaciers |

149



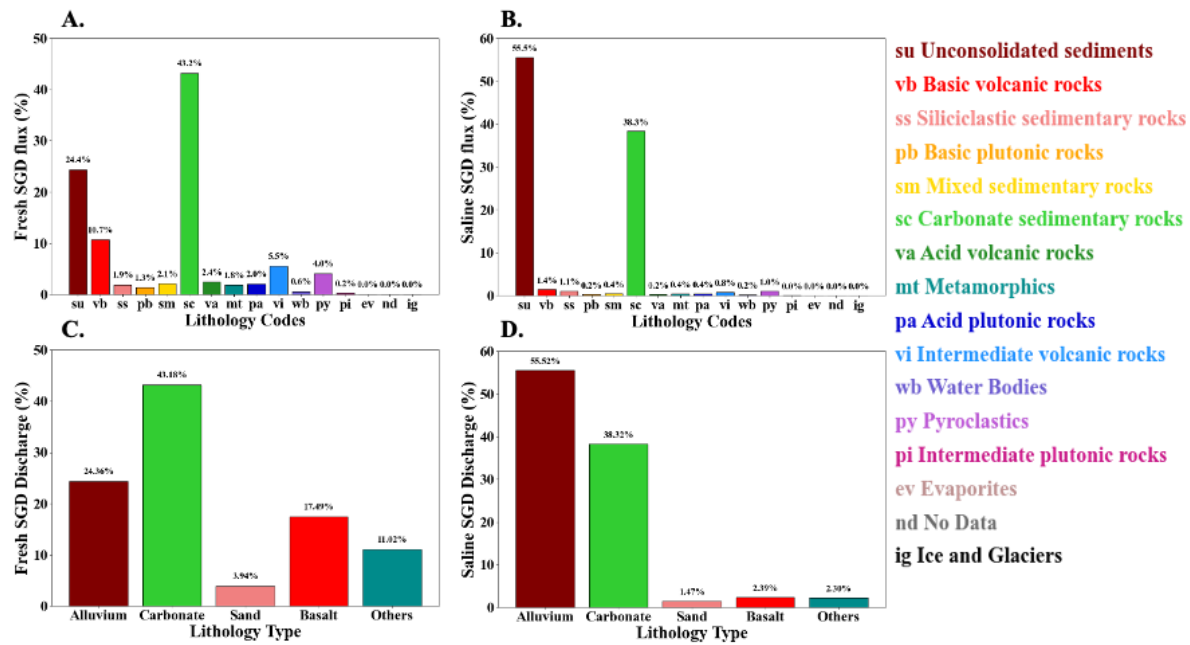

Fig. S1. The discharged percentage by each rock type worldwide for freshwater (61) and the long-term seawater circulation (saline water) are divided into lithological classifications based on high-resolution surface lithology (62) (A for freshwater and B for saline water) as well as our classification (C for freshwater and D for saline water). The colored legend at the right is for the rock classification of subplots A and B.

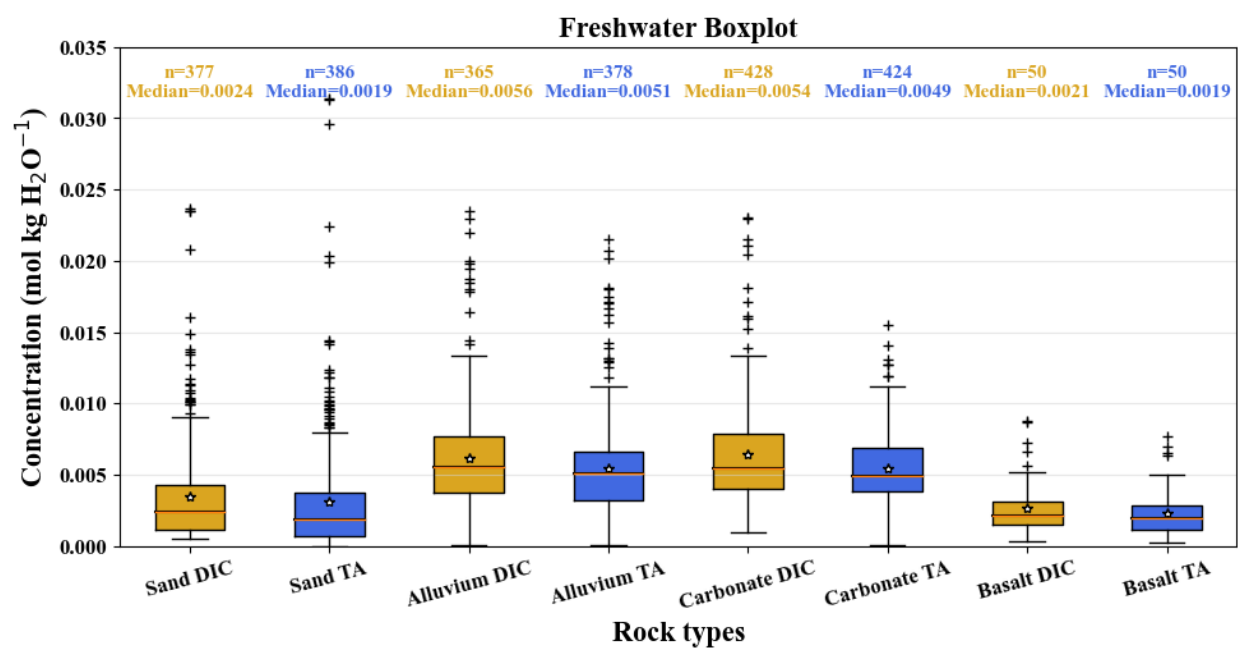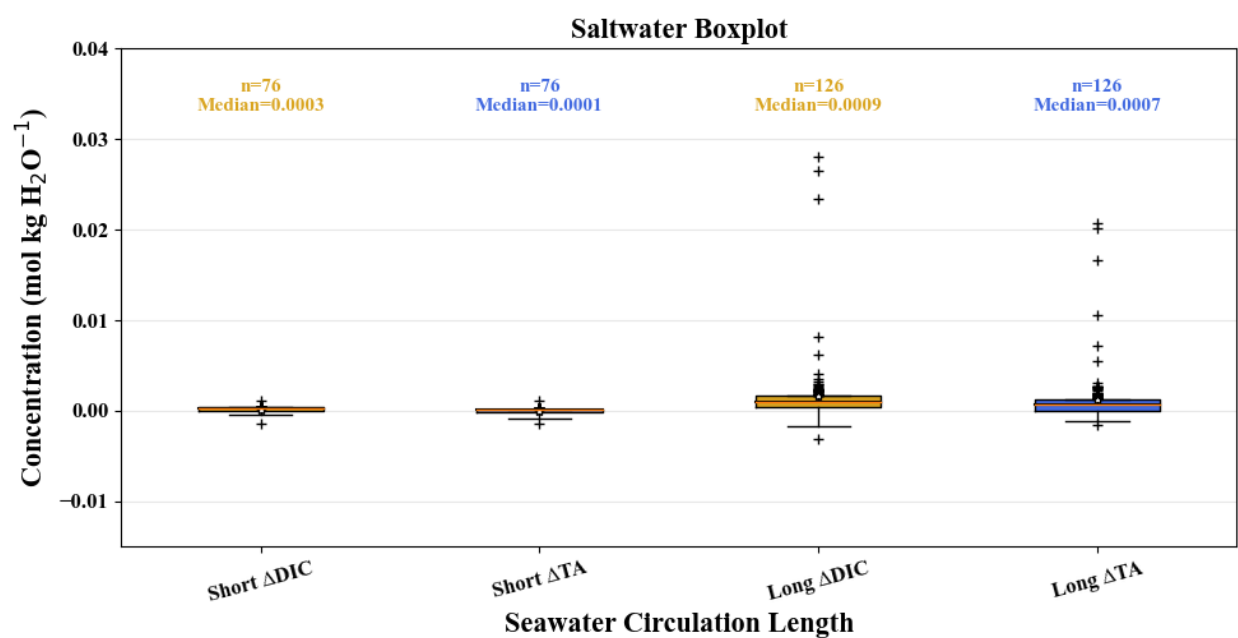

Fig. S2. Boxplots showing concentrations of DIC (brownish-yellow boxes) and TA (blue boxes) in groundwater samples. Upper plot: concentrations across different rock types: Sand, Alluvium, Carbonate, and Basalt in fresh groundwater. Lower plot: concentrations grouped by seawater circulation length (short vs. long) in saline groundwater. In each boxplot, red lines indicate median values and white asterisks denote sample means. Numbers and median concentrations are annotated above each box.

### Freshwater histograms

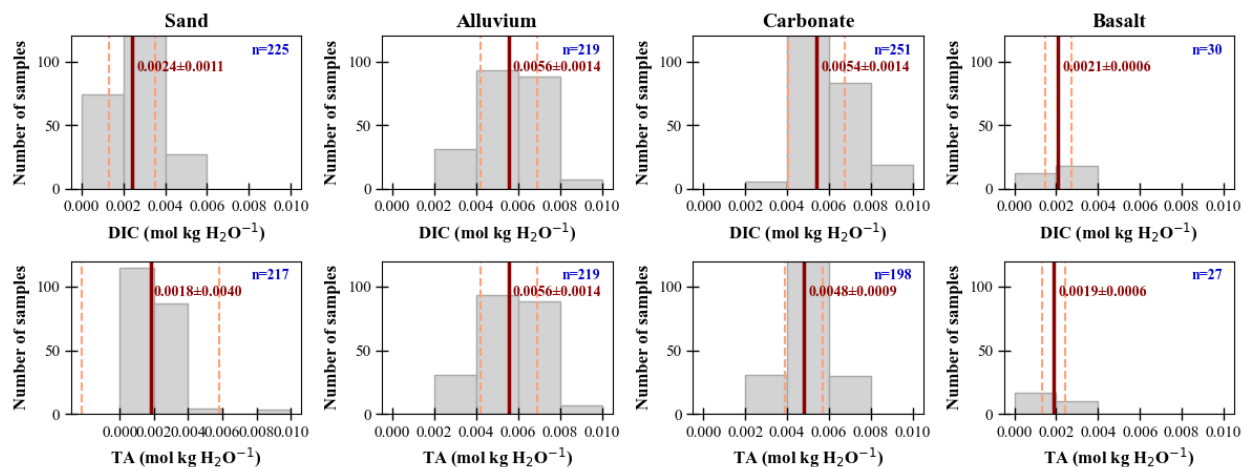

### Saltwater Histograms

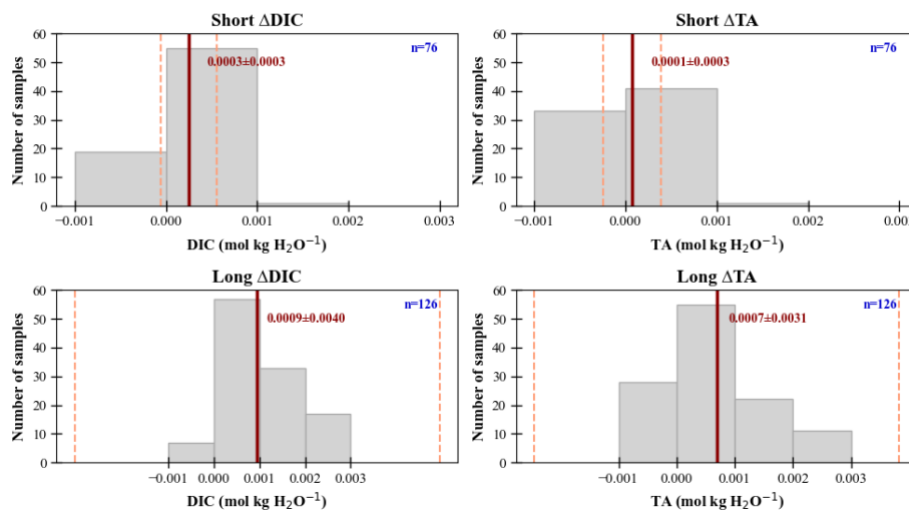

**Fig. S3.** Histograms showing the distribution of DIC and TA concentrations in groundwater samples. The upper two rows display freshwater samples across different rock types: Sand, Alluvium, Carbonate, and Basalt, based on filtered data from the boxplots in Fig. S2. The lower two rows show saline groundwater samples grouped by short and long seawater circulation lengths. Median values are indicated by red lines, with corresponding values and standard deviations next to them. Dashed red lines represent one standard deviation from the median. Sample sizes (n) are noted in blue in the upper right corner of each subplot.

## 173 SI References

- 174 1. Parkhurst, D. L. & Appelo, C. A. J. *PHREEQC 2.15. A Computer Program for Speciation,*  
175 *Batch-Reaction, One-Dimensional Transport and Inverse Geochemical Calculation, Water-*  
176 *Resources Investigation.* (1999).
- 177 2. Stumm, W. & Morgan, J. J. *Aquatic Chemistry: Chemical Equilibria and Rates in Natural*  
178 *Waters, 3rd Ed.* (John Wiley & Sons, Inc., New York, 1996).
- 179 3. Luijendijk, E., Gleeson, T. & Moosdorf, N. Fresh groundwater discharge insignificant for  
180 the world's oceans but important for coastal ecosystems. *Nat Commun* **11**, (2020).
- 181 4. Hartmann, J. & Moosdorf, N. The new global lithological map database GLiM: A  
182 representation of rock properties at the Earth surface. *Geochemistry, Geophysics,*  
183 *Geosystems* **13**, 1–37 (2012).
- 184 5. Michael, H. A. *et al.* Geologic influence on groundwater salinity drives large seawater  
185 circulation through the continental shelf. *Geophys Res Lett* **43**, 10,782–10,791 (2016).
- 186 6. Magaritz, M. & Luzier, J. E. Water-rock interactions and seawater-freshwater mixing  
187 effects in the coastal dunes aquifer, Coos Bay, Oregon. *Geochim Cosmochim Acta* **49**,  
188 2515–2525 (1985).
- 189 7. Chapelle, F. H., Zelibor, J. L., Grimes, D. J. & Knobel, L. R. L. Bacteria in deep coastal  
190 plain sediments of Maryland: A possible source of CO<sub>2</sub> to groundwater. *Water Resour Res*  
191 **23**, 1625–1632 (1987).
- 192 8. Price, R. M. & Herman, J. S. Geochemical investigation of salt-water intrusion into a coastal  
193 carbonate aquifer: Mallorca, Spain. *Geol Soc Am Bull* **103**, 1270–1279 (1991).
- 194 9. Wicks, M. & Herman, J. S. Regional hydrogeochemistry of a modern coastal mixing zone.  
195 *Water Resour Res* **32**, 401–407 (1996).
- 196 10. Barker, A. P., Newton, R. J., Bottrell, S. H. & Tellam, J. H. Processes affecting groundwater  
197 chemistry in a zone of saline intrusion into an urban sandstone aquifer. *Applied*  
198 *Geochemistry* **13**, 735–749 (1998).
- 199 11. Mahlknecht, J., Steinich, B. & Navarro De León, I. Groundwater chemistry and mass  
200 transfers in the Independence aquifer, central Mexico, by using multivariate statistics and  
201 mass-balance models. *Environmental Geology* **45**, 781–795 (2004).
- 202 12. Andersen, M. S., Nyvang, V., Jakobsen, R. & Postma, D. Geochemical processes and solute  
203 transport at the seawater/freshwater interface of a sandy aquifer. *Geochim Cosmochim Acta*  
204 **69**, 3979–3994 (2005).
- 205 13. Charideh, A. & Rahman, A. Environmental isotopic and hydrochemical study of water in  
206 the karst aquifer and submarine springs of the Syrian coast. *Hydrogeol J* **15**, 351–364  
207 (2007).
- 208 14. Bouchaou, L. *et al.* Application of multiple isotopic and geochemical tracers for  
209 investigation of recharge, salinization, and residence time of water in the Souss-Massa  
210 aquifer, southwest of Morocco. *J Hydrol (Amst)* **352**, 267–287 (2008).
- 211 15. de Montety, V. *et al.* Origin of groundwater salinity and hydrogeochemical processes in a  
212 confined coastal aquifer: Case of the Rhône delta (Southern France). *Applied Geochemistry*  
213 **23**, 2337–2349 (2008).

- 214 16. Gattacceca, J. C. *et al.* Isotopic and geochemical characterization of salinization in the  
215 shallow aquifers of a reclaimed subsiding zone: The southern Venice Lagoon coastland. *J*  
216 *Hydrol (Amst)* **378**, 46–61 (2009).
- 217 17. Chae, G. T., Yun, S. T., Yun, S. M., Kim, K. H. & So, C. S. Seawater–freshwater mixing  
218 and resulting calcite dissolution: an example from a coastal alluvial aquifer in eastern South  
219 Korea. *Hydrological Sciences Journal* **57**, 1672–1683 (2012).
- 220 18. Vandenbohede, A. & Lebbe, L. Groundwater chemistry patterns in the phreatic aquifer of  
221 the central Belgian coastal plain. *Applied Geochemistry* **27**, 22–36 (2012).
- 222 19. Ahmed, M. A., Abdel Samie, S. G. & Badawy, H. A. Factors controlling mechanisms of  
223 groundwater salinization and hydrogeochemical processes in the Quaternary aquifer of the  
224 Eastern Nile Delta, Egypt. *Environ Earth Sci* **68**, 369–394 (2013).
- 225 20. Vinson, D. S. *et al.* Occurrence and mobilization of radium in fresh to saline coastal  
226 groundwater inferred from geochemical and isotopic tracers (Sr, S, O, H, Ra, Rn). *Applied*  
227 *Geochemistry* **38**, 161–175 (2013).
- 228 21. Zhang, W., Chen, X., Tan, H., Zhang, Y. & Cao, J. Geochemical and isotopic data for  
229 restricting seawater intrusion and groundwater circulation in a series of typical volcanic  
230 islands in the South China Sea. *Mar Pollut Bull* **93**, 153–162 (2015).
- 231 22. Díaz-Puga, M. A. *et al.* Groundwater flow and residence time in a karst aquifer using ion  
232 and isotope characterization. *International Journal of Environmental Science and*  
233 *Technology* **13**, 2579–2596 (2016).
- 234 23. Han, D., Song, X. & Currell, M. J. Identification of anthropogenic and natural inputs of  
235 sulfate into a karstic coastal groundwater system in northeast China: Evidence from major  
236 ions,  $\delta^{13}\text{CDIC}$  and  $\delta^{34}\text{SSO}_4$ . *Hydrol Earth Syst Sci* **20**, 1983–1999 (2016).
- 237 24. Sajil Kumar, P. J. Deciphering the groundwater–saline water interaction in a complex  
238 coastal aquifer in South India using statistical and hydrochemical mixing models. *Model*  
239 *Earth Syst Environ* **2**, 1–11 (2016).
- 240 25. Santoni, S. *et al.* Residence time, mineralization processes and groundwater origin within a  
241 carbonate coastal aquifer with a thick unsaturated zone. *J Hydrol (Amst)* **540**, 50–63 (2016).
- 242 26. Carreira, P. M., Bahir, M., Salah, O., Galego Fernandes, P. & Nunes, D. Tracing salinization  
243 processes in coastal aquifers using an isotopic and geochemical approach: comparative  
244 studies in western Morocco and southwest Portugal. *Hydrogeol J* **26**, 2595–2615 (2018).
- 245 27. Han, D. & Currell, M. J. Delineating multiple salinization processes in a coastal plain  
246 aquifer, northern China: Hydrochemical and isotopic evidence. *Hydrol Earth Syst Sci* **22**,  
247 3473–3491 (2018).
- 248 28. Vallejos, A., Sola, F., Yechieli, Y. & Pulido-Bosch, A. Influence of the paleogeographic  
249 evolution on the groundwater salinity in a coastal aquifer. Cabo de Gata aquifer, SE Spain.  
250 *J Hydrol (Amst)* **557**, 55–66 (2018).
- 251 29. Mohanty, A. K. & Rao, V. V. S. G. Hydrogeochemical, seawater intrusion and oxygen  
252 isotope studies on a coastal region in the Puri District of Odisha, India. *Catena (Amst)* **172**,  
253 558–571 (2019).
- 254 30. Monnin, C. *et al.* Freshening of a Coastal Karst Aquifer Revealed by the Temporal Changes  
255 in a Spring Water Composition (La Palme, Southern France). *Hydrology* **2**, 45 (2019).

31. Naus, F. L., Schot, P., Groen, K., Matin Ahmed, K. & Griffioen, J. Groundwater salinity variation in Upazila Assasuni (southwestern Bangladesh), as steered by surface clay layer thickness, relative elevation and present-day land use. *Hydrol Earth Syst Sci* **23**, 1431–1451 (2019).
32. Yechieli, Y. *et al.* Recent seawater intrusion into deep aquifer determined by the radioactive noble-gas isotopes  $^{81}\text{Kr}$  and  $^{39}\text{Ar}$ . *Earth Planet Sci Lett* **507**, 21–29 (2019).
33. Houéménou, H. *et al.* Degradation of groundwater quality in expanding cities in West Africa. A case study of the unregulated shallow aquifer in Cotonou. *J Hydrol (Amst)* **582**, (2020).
34. Okuhata, B. K., Dulai, H., Shuler, C. K., Fackrell, J. K. & El-Kadi, A. I. Metal mobilization as an effect of anthropogenic contamination in groundwater aquifers in Tutuila, American Samoa. *Water (Switzerland)* **12**, (2020).
35. Pain, A. J., Martin, J. B., Young, C. R., Valle-Levinson, A. & Mariño-Tapia, I. Carbon and phosphorus processing in a carbonate karst aquifer and delivery to the coastal ocean. *Geochim Cosmochim Acta* **269**, 484–495 (2020).
36. Vallejos, A., Daniele, L., Sola, F., Molina, L. & Pulido-Bosch, A. Anthropogenic-induced salinization in a dolomite coastal aquifer. Hydrogeochemical processes. *J Geochem Explor* **209**, (2020).
37. Godfrey, L. V. *et al.*  $\delta^{13}\text{C}$  and  $^{14}\text{C}$  activity of groundwater DOC and DIC in the volcanically active and arid Loa Basin of northern Chile. *J Hydrol (Amst)* **595**, (2021).
38. Zhang, B. & Zhang, J. The hydrological connection between fresh submarine groundwater discharge and coastal groundwater: an isotopic and a decadal hydrochemistry approach in an alluvial fan, central Japan. *Environ Earth Sci* **80**, (2021).
39. Sola, F. & Vallejos, A. Long and short-term cation exchange linked to a negative hydraulic barrier in a coastal aquifer. *Science of the Total Environment* **819**, (2022).
40. Cai, W. J., Wang, Y., Krest, J. & Moore, W. S. The geochemistry of dissolved inorganic carbon in a surficial groundwater aquifer in North Inlet, South Carolina, and the Carbon fluxes to the coastal ocean. *Geochim Cosmochim Acta* **67**, 631–639 (2003).
41. Gramling, C. M., McCorkle, D. C., Mulligan, A. E. & Woods, T. L. A carbon isotope method to quantify groundwater discharge at the land-sea interface. *Limnol Oceanogr* **48**, 957–970 (2003).
42. Sivan, O., Yechieli, Y., Herut, B. & Lazar, B. Geochemical evolution and timescale of seawater intrusion into the coastal aquifer of Israel. *Geochim Cosmochim Acta* **69**, 579–592 (2005).
43. Russak, A. & Sivan, O. Hydrogeochemical tool to identify salinization or freshening of coastal aquifers determined from combined field work, experiments, and modeling. *Environ Sci Technol* **44**, 4096–4102 (2010).
44. Bakari, S. S. *et al.* Groundwater residence time and paleorecharge conditions in the deep confined aquifers of the coastal watershed, South-East Tanzania. *J Hydrol (Amst)* **466–467**, 127–140 (2012).

45. Liu, Q. *et al.* How significant is submarine groundwater discharge and its associated dissolved inorganic carbon in a river-dominated shelf system? *Biogeosciences* **9**, 1777–1795 (2012).
46. Liu, Q. *et al.* Effect of submarine groundwater discharge on the coastal ocean inorganic carbon cycle. *Limnol Oceanogr* **59**, 1529–1554 (2014).
47. Wang, G. *et al.* Coastal acidification induced by tidal-driven submarine groundwater discharge in a coastal coral reef system. *Environ Sci Technol* **48**, 13069–13075 (2014).
48. Lee, J. & Kim, G. Dependence of coastal water pH increases on submarine groundwater discharge off a volcanic island. *Estuar Coast Shelf Sci* **163**, 15–21 (2015).
49. Wang, G. *et al.* Net subterranean estuarine export fluxes of dissolved inorganic C, N, P, Si, and total alkalinity into the Jiulong River estuary, China. *Geochim Cosmochim Acta* **149**, 103–114 (2015).
50. Sadat-Noori, M., Maher, D. T. & Santos, I. R. Groundwater Discharge as a Source of Dissolved Carbon and Greenhouse Gases in a Subtropical Estuary. *Estuaries and Coasts* **39**, 639–656 (2016).
51. Bryan, E., Meredith, K. T., Baker, A., Andersen, M. S. & Post, V. E. A. Carbon dynamics in a Late Quaternary-age coastal limestone aquifer system undergoing saltwater intrusion. *Science of the Total Environment* **607–608**, 771–785 (2017).
52. Caschetto, M., Colombani, N., Mastrocicco, M., Petitta, M. & Aravena, R. Nitrogen and sulphur cycling in the saline coastal aquifer of Ferrara, Italy. A multi-isotope approach. *Applied Geochemistry* **76**, 88–98 (2017).
53. Liu, Q. *et al.* Carbonate system biogeochemistry in a subterranean estuary – Waquoit Bay, USA. *Geochim Cosmochim Acta* **203**, 422–439 (2017).
54. Prouty, N. G. *et al.* Vulnerability of Coral Reefs to Bioerosion From Land-Based Sources of Pollution. *J Geophys Res Oceans* **122**, 9319–9331 (2017).
55. Bandara, U. G. C. *et al.* Arsenic-rich shallow groundwater in sandy aquifer systems buffered by rising carbonate waters: A geochemical case study from Mannar Island, Sri Lanka. *Science of the Total Environment* **633**, 1352–1359 (2018).
56. Meredith, K. T. *et al.* Evolution of dissolved inorganic carbon in groundwater recharged by cyclones and groundwater age estimations using the <sup>14</sup>C statistical approach. *Geochim Cosmochim Acta* **220**, 483–498 (2018).
57. Murgulet, D. *et al.* Temporal and spatial fluctuations of groundwater-derived alkalinity fluxes to a semiarid coastal embayment. *Science of the Total Environment* **630**, 1343–1359 (2018).
58. Tan, E., Wang, G., Moore, W. S., Li, Q. & Dai, M. Shelf-Scale Submarine Groundwater Discharge in the Northern South China Sea and East China Sea and its Geochemical Impacts. *J Geophys Res Oceans* **123**, 2997–3013 (2018).
59. Dai, G., Wang, G., Li, Q., Tan, E. & Dai, M. Submarine Groundwater Discharge on the Western Shelf of the Northern South China Sea Influenced by the Pearl River Plume and Upwelling. *J Geophys Res Oceans* **126**, (2021).

- 336 60. Kolker, D., Bookman, R., Herut, B., David, N. & Silverman, J. An Initial Assessment of the  
337 Contribution of Fresh Submarine Ground Water Discharge to the Alkalinity Budget of the  
338 Mediterranean Sea. *J Geophys Res Oceans* **126**, 1–10 (2021).
- 339 61. Liu, Y. *et al.* Inorganic carbon and alkalinity biogeochemistry and fluxes in an intertidal  
340 beach aquifer: Implications for ocean acidification. *J Hydrol (Amst)* **595**, 126036 (2021).
- 341 62. Reithmaier, G. M. S. *et al.* Rainfall drives rapid shifts in carbon and nutrient source-sink  
342 dynamics of an urbanised, mangrove-fringed estuary. *Estuar Coast Shelf Sci* **249**, (2021).
- 343
